# Supplementary material for: Recovery of Li2CO3 from Spent LiFePO4 by Using a Novel Impurity Elimination Process
Source: MDPI journal article supplement (doi:10.3390/molecules28093902), 2023-05-05
Supplement: s1 [file s1]

# **Recovery of $\text{Li}_2\text{CO}_3$ from spent $\text{LiFePO}_4$ by using a novel impurity elimination process**

Wen-Lan Chen,<sup>1,2,3,4</sup> Chi Chen,<sup>1,3,4</sup> Hao Xiao,<sup>1,3,4,5</sup> Cheng-Wei Chen,<sup>1,3,4,\*</sup> Dan Sun<sup>1,3,4,\*</sup>

<sup>1</sup> CAS Key Laboratory of Design and Assembly of Functional Nanostructures, and Fujian Provincial Key Laboratory of Nanomaterials, Fujian Institute of Research on the Structure of Matter, Chinese Academy of Sciences, Fuzhou 350002, China

<sup>2</sup> College of Chemistry and Materials, Fujian Normal University, Fuzhou 350007, China

<sup>3</sup> Xiamen Institute of Rare Earth Materials, Haixi Institutes, Chinese Academy of Sciences, Xiamen 361021, China

<sup>4</sup> Xiamen Key Laboratory of Rare Earth Photoelectric Functional Materials, Xiamen 361021, China

<sup>5</sup> College of Chemistry, Fuzhou University, Fuzhou 350108, China

E-mail address: xmsundan@fjirms.ac.cn

\*Corresponding author

E-mail address: chenchengwei@fjirms.ac.cn (C. Chen), xmsundan@fjirms.ac.cn (D. Sun)

---

## Supporting information

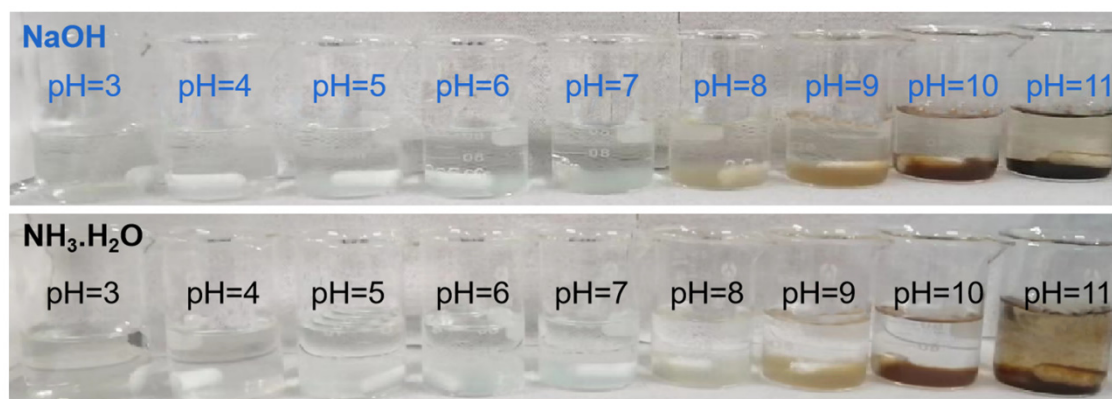

Figure S1. The photo of purified Li<sup>+</sup>-containing liquid obtained by adding purification reagent (NaOH and NH<sub>3</sub>·H<sub>2</sub>O).

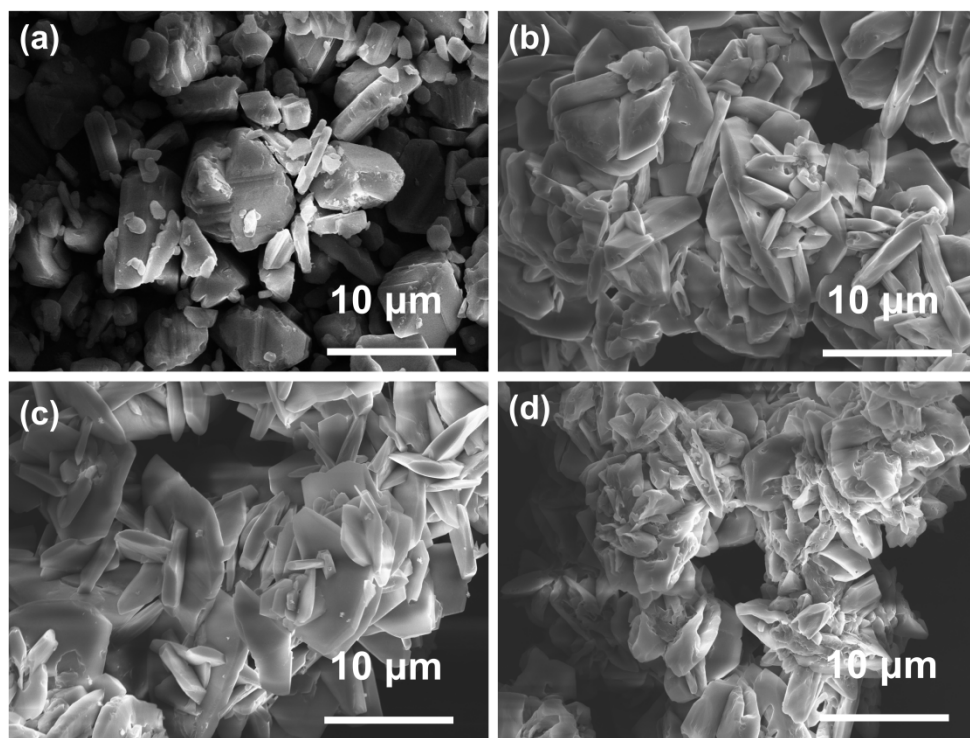

Figure S2. SEM of different lithium carbonate: (a) LCO<sub>commercial</sub>, (b) LCO<sub>Na</sub>, (c) LCO<sub>NH<sub>3</sub></sub> and (d) LCO<sub>NaNH<sub>3</sub></sub>.

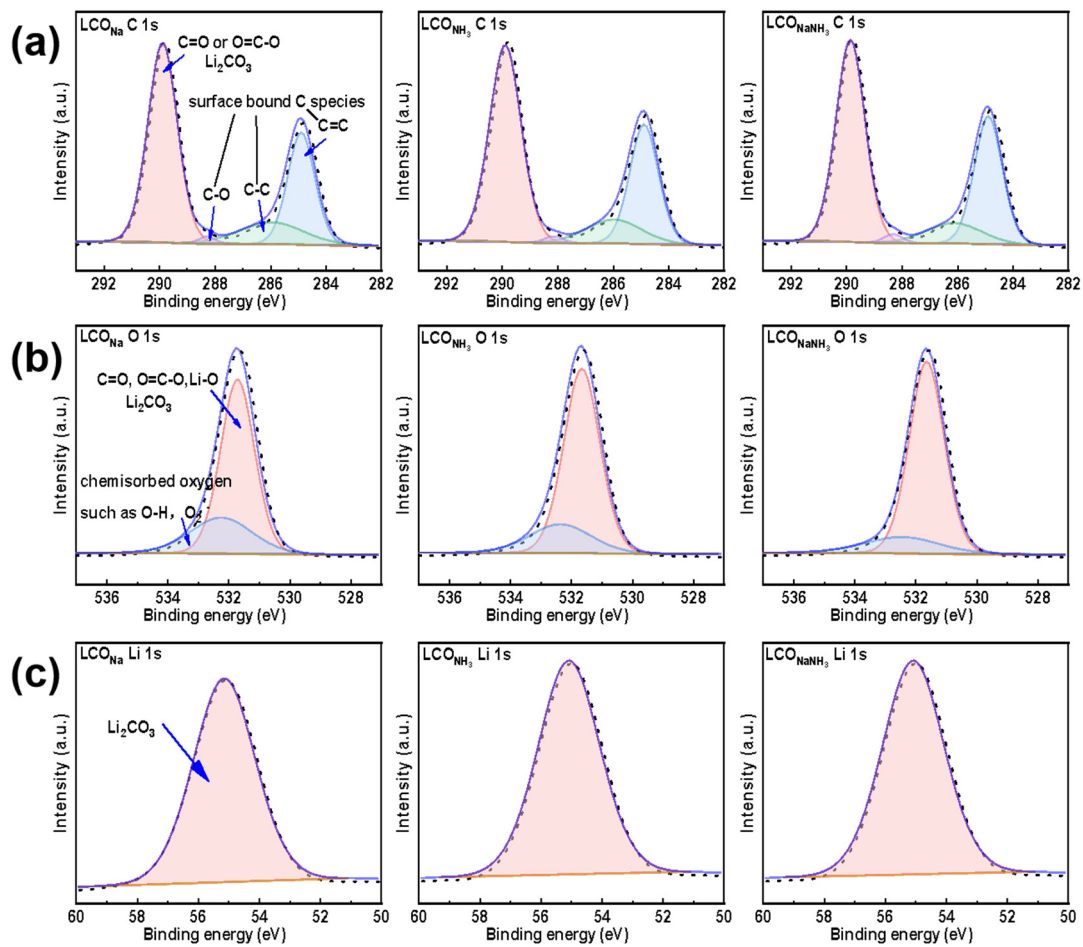

Figure S3. XPS spectrum of (a) C 1s, (b) O 1s, (c) Li 1s in  $\text{LCO}_{\text{Na}}$ ,  $\text{LCO}_{\text{NH}_3}$  and  $\text{LCO}_{\text{NaNH}_3}$ .

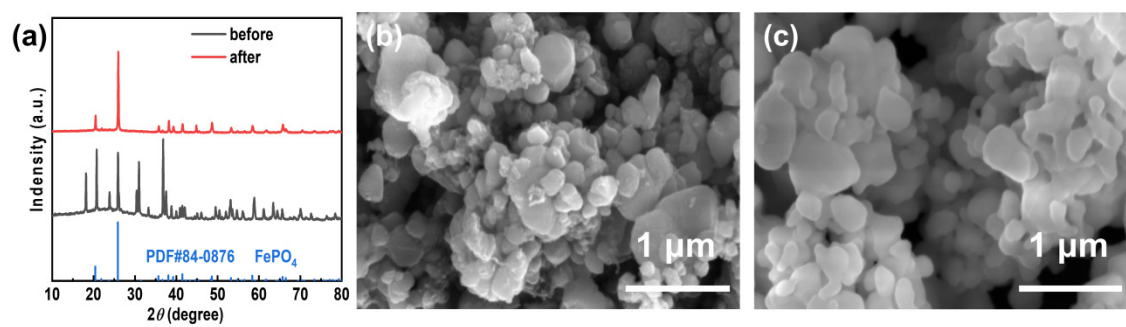

Figure S4. (a) XRD and SEM (b) before sintering and (c) after sintering of FePO<sub>4</sub>.

---

Table S1 ICP-OES analysis of the SLFP.

| Elements        | Fe    | P     | Li   | Al    | Ca    | Cu    | K     | Mg    | Mn    | Na    | Ni    | Pb    | Si    | Zn    |
|-----------------|-------|-------|------|-------|-------|-------|-------|-------|-------|-------|-------|-------|-------|-------|
| Mass ration (%) | 32.57 | 18.72 | 4.22 | 0.613 | 0.059 | 0.041 | 0.004 | 0.010 | 0.053 | 0.024 | 0.023 | 0.001 | 0.014 | 0.002 |

---

Table S2. The result data of purified Li<sup>+</sup>-containing liquid by adding purification reagent (NaOH).

| pH | Mass of elemental impurities (mg) |      |      |      |      |      |      |       |      |      |      |      |
|----|-----------------------------------|------|------|------|------|------|------|-------|------|------|------|------|
|    | Al                                | Ca   | Cu   | Fe   | K    | Mg   | Mn   | Na    | Ni   | Pb   | Si   | Zn   |
| 2  | 1.97                              | 0.59 | 0.67 | 0.16 | 0.10 | 0.11 | 1.81 | 0.42  | 0.64 | 0.00 | 0.09 | 0.02 |
| 3  | 1.96                              | 0.58 | 0.64 | 0.03 | 0.08 | 0.11 | 1.80 | 5.34  | 0.60 | 0.00 | 0.54 | 0.02 |
| 4  | 1.05                              | 0.49 | 0.61 | 0.00 | 0.08 | 0.10 | 1.80 | 8.10  | 0.58 | 0.00 | 0.56 | 0.02 |
| 5  | 0.48                              | 0.46 | 0.45 | 0.00 | 0.10 | 0.10 | 1.80 | 9.01  | 0.58 | 0.00 | 0.57 | 0.01 |
| 6  | 0.08                              | 0.33 | 0.07 | 0.00 | 0.10 | 0.09 | 1.47 | 10.34 | 0.51 | 0.00 | 0.58 | 0.00 |
| 7  | 0.01                              | 0.28 | 0.01 | 0.00 | 0.11 | 0.09 | 0.89 | 11.56 | 0.35 | 0.00 | 0.58 | 0.00 |
| 8  | 0.01                              | 0.22 | 0.00 | 0.00 | 0.11 | 0.08 | 0.31 | 12.37 | 0.10 | 0.00 | 0.53 | 0.00 |
| 9  | 0.10                              | 0.15 | 0.00 | 0.00 | 0.12 | 0.07 | 0.01 | 12.65 | 0.01 | 0.00 | 0.36 | 0.00 |
| 10 | 0.72                              | 0.09 | 0.00 | 0.00 | 0.12 | 0.04 | 0.01 | 12.99 | 0.00 | 0.00 | 0.35 | 0.00 |
| 11 | 1.58                              | 0.06 | 0.00 | 0.00 | 0.13 | 0.00 | 0.00 | 14.35 | 0.00 | 0.00 | 0.74 | 0.00 |

Table S3. The result data of purified  $\text{Li}^+$ -containing liquid by adding purification reagent ( $\text{NH}_3 \cdot \text{H}_2\text{O}$ ).

| pH | Mass of elemental impurities (mg) |      |      |      |      |      |      |      |      |      |      |      |
|----|-----------------------------------|------|------|------|------|------|------|------|------|------|------|------|
|    | Al                                | Ca   | Cu   | Fe   | K    | Mg   | Mn   | Na   | Ni   | Pb   | Si   | Zn   |
| 2  | 1.97                              | 0.59 | 0.67 | 0.16 | 0.10 | 0.11 | 1.81 | 0.42 | 0.64 | 0.00 | 0.09 | 0.02 |
| 3  | 1.97                              | 0.56 | 0.67 | 0.06 | 0.05 | 0.11 | 1.77 | 0.37 | 0.63 | 0.00 | 0.09 | 0.02 |
| 4  | 1.05                              | 0.55 | 0.64 | 0.00 | 0.10 | 0.11 | 1.77 | 0.40 | 0.62 | 0.00 | 0.09 | 0.02 |
| 5  | 0.38                              | 0.52 | 0.39 | 0.00 | 0.08 | 0.11 | 1.76 | 0.40 | 0.62 | 0.00 | 0.09 | 0.02 |
| 6  | 0.03                              | 0.40 | 0.06 | 0.00 | 0.08 | 0.10 | 1.61 | 0.40 | 0.58 | 0.00 | 0.09 | 0.00 |
| 7  | 0.02                              | 0.36 | 0.01 | 0.00 | 0.08 | 0.10 | 1.18 | 0.40 | 0.47 | 0.00 | 0.09 | 0.00 |
| 8  | 0.03                              | 0.29 | 0.01 | 0.00 | 0.07 | 0.10 | 0.39 | 0.39 | 0.21 | 0.00 | 0.08 | 0.00 |
| 9  | 0.13                              | 0.18 | 0.01 | 0.00 | 0.07 | 0.08 | 0.04 | 0.39 | 0.04 | 0.00 | 0.06 | 0.00 |
| 10 | 1.37                              | 0.14 | 0.32 | 0.00 | 0.09 | 0.05 | 0.02 | 0.35 | 0.28 | 0.00 | 0.08 | 0.00 |
| 11 | 1.91                              | 0.11 | 0.59 | 0.00 | 0.10 | 0.01 | 0.01 | 0.37 | 0.39 | 0.00 | 0.16 | 0.02 |



Table S4. Composition analysis of different  $\text{Li}_2\text{CO}_3$ .

| Impurity                 | Ratio of $\text{Li}_2\text{CO}_3$ (%) |                            |                              |
|--------------------------|---------------------------------------|----------------------------|------------------------------|
|                          | $\text{LCO}_{\text{Na}}$              | $\text{LCO}_{\text{NH}_3}$ | $\text{LCO}_{\text{NaNH}_3}$ |
| Al                       | 0.0001                                | 0.0002                     | 0.0001                       |
| Ca                       | 0.0018                                | 0.0274                     | 0.0048                       |
| Cu                       | 0.0000                                | 0.0006                     | 0.0000                       |
| Fe                       | 0.0003                                | 0.0001                     | 0.0004                       |
| K                        | 0.0005                                | 0.0008                     | 0.0005                       |
| Mg                       | 0.0007                                | 0.0048                     | 0.0021                       |
| Mn                       | 0.0000                                | 0.0433                     | 0.0000                       |
| Na                       | 0.0018                                | 0.0015                     | 0.0016                       |
| Ni                       | 0.0001                                | 0.0236                     | 0.0008                       |
| Pb                       | 0.0001                                | 0.0001                     | 0.0000                       |
| Si                       | 0.0255                                | 0.0029                     | 0.0029                       |
| Zn                       | 0.0001                                | 0.0003                     | 0.0002                       |
| $\text{Li}_2\text{CO}_3$ | 99.35                                 | 97.18                      | 99.51                        |

Table S5 Composition analysis of the FePO<sub>4</sub>.

| Test item         | Fe    | P     | Fe:P | Al     | Ca     | Cu     | K      | Mg     | Mn     | Na     | Ni     | Pb     | Si     | Zn     |
|-------------------|-------|-------|------|--------|--------|--------|--------|--------|--------|--------|--------|--------|--------|--------|
| Mass ratio<br>(%) | 36.42 | 20.70 | 0.98 | 0.0718 | 0.0137 | 0.0346 | 0.0061 | 0.0079 | 0.0163 | 0.0429 | 0.0141 | 0.0034 | 0.0307 | 0.0057 |
